# Supplementary material for: Temporal and spatial patterns of small vertebrate roadkill in a supercity of eastern China
Source: PeerJ. 2023 Oct 9;11:e16251. doi: 10.7717/peerj.16251 (PMC10569179; doi:10.7717/peerj.16251)
Supplement: Supplemental Information 2 [file peerj-11-16251-s002.xls]

## Sheet: Road-kill data
The original roadkill data of small vertebrates in a supercity of eastern China from 2020 to 2021
Date	Species	latitude(°)	longitude(°)	Road
2023-10-17	Cat	32.1333	118.861	S1
2023-10-17	Unidentified bird	32.1333	118.861	S1
2023-10-18	Unidentified mammal	31.796	118.766	S3
2023-10-31	Unidentified bird	32.2077	119.086	S1
2023-10-31	Unidentified bird	32.2083	119.103	S1
2023-10-31	Cat	32.2035	119.161	X1
2023-10-31	Dog	32.2125	119.228	X1
2023-10-31	Unidentified bird	32.2407	119.3	G1
2023-11-01	Cat	32.2689	119.373	G1
2023-11-01	Cat	32.2972	119.446	G1
2023-11-01	Cat	32.3254	119.518	G2
2023-11-08	Hedgehog	32.3536	119.591	X1
2023-11-08	Cat	32.3819	119.664	G1
2023-11-14	Unidentified mammal	32.4101	119.736	X3
2023-11-14	White Wagtail	32.4383	119.809	S3
2023-11-14	Hedgehog	32.4666	119.882	G3
2023-11-28	Unidentified bird	32.4948	119.955	G3
2023-11-28	Dog	32.523	120.027	G3
2023-11-28	Mouse	32.5512	120.1	S3
2023-11-28	Cat	32.5795	120.173	S3
2023-11-28	Unidentified mammal	32.6077	120.245	X3
2023-11-28	Dog	32.6359	120.318	X3
2023-11-29	Unidentified bird	32.6642	120.391	S1
2023-11-29	Cat	32.6924	120.464	S2
2023-11-29	Cat	32.7206	120.536	S2
2023-11-29	Mouse	32.7488	120.609	S2
2023-11-29	Unidentified bird	32.7771	120.682	G2
2023-11-29	Dog	32.8053	120.754	X2
2023-11-29	Unidentified bird	32.8335	120.827	X2
2023-11-29	Cat	32.8618	120.9	G1
2023-11-30	Unidentified mammal	32.89	120.972	X1
2023-11-30	Mouse	32.9182	121.045	S1
2023-11-30	Hedgehog	32.9464	121.118	S1
2023-12-04	Hedgehog	32.9747	121.191	S1
2023-12-04	Unidentified bird	33.0029	121.263	X1
2023-12-04	Unidentified mammal	33.0311	121.336	S1
2023-12-05	Cat	33.0594	121.409	G2
2023-12-05	Cat	33.0876	121.481	S1
2023-12-06	Dog	33.1158	121.554	X3
2023-12-06	Unidentified bird	33.1441	121.627	S3
2023-12-06	Unidentified bird	33.1723	121.7	G3
2023-12-06	Unidentified bird	33.2005	121.772	G3
2023-12-06	Cat	33.2287	121.845	G3
2023-12-06	Cat	33.257	121.918	G1
2023-12-06	Dog	33.2852	121.99	G1
2023-12-18	Chicken	33.3134	122.063	S2
2023-12-18	Blackbird	33.3417	122.136	S2
2023-12-18	Unidentified bird	33.3699	122.208	S2
2023-12-18	Mouse	33.3981	122.281	S2
2023-12-18	Mouse	33.4263	122.354	G2
2023-12-18	Blackbird	33.4546	122.427	G2
2023-12-18	Unidentified mammal	33.4828	122.499	G1
2023-12-19	Cat	33.511	122.572	S3
2023-12-19	Hedgehog	33.5393	122.645	S3
2023-01-12	Mouse	33.5675	122.717	G1
2023-01-12	Cat	33.5957	122.79	G1
2023-01-12	Cat	33.6239	122.863	G1
2023-01-12	Unidentified bird	33.6522	122.936	G3
2023-01-12	Unidentified bird	33.6804	123.008	G3
2023-01-12	Unidentified bird	33.7086	123.081	G3
2023-01-12	Unidentified bird	33.7369	123.154	G3
2023-01-12	Spotted Dove	33.7651	123.226	G3
2023-01-12	Unidentified bird	33.7933	123.299	S3
2023-01-12	Unidentified bird	33.8215	123.372	X3
2023-01-12	Cat	33.8498	123.445	X3
2023-01-13	Unidentified bird	33.878	123.517	X2
2023-01-13	Blackbird	33.9062	123.59	S2
2023-01-13	Blackbird	33.9345	123.663	S2
2023-01-13	Blackbird	33.9627	123.735	S2
2023-01-13	Dog	33.9909	123.808	S1
2023-01-13	Cat	34.0192	123.881	S1
2023-01-21	Unidentified bird	34.0474	123.953	G3
2023-01-21	Unidentified mammal	34.0756	124.026	G1
2023-01-23	Blackbird	34.1038	124.099	S2
2023-01-23	Blackbird	34.1321	124.172	G2
2023-02-01	Unidentified mammal	34.1603	124.244	G3
2023-02-01	Unidentified bird	34.1885	124.317	G3
2023-02-02	Unidentified bird	34.2168	124.39	X2
2023-02-02	Blackbird	34.245	124.462	S2
2023-02-27	Unidentified bird	34.2732	124.535	G1
2023-02-27	Unidentified bird	34.3014	124.608	G1
2023-02-27	Unidentified bird	34.3297	124.681	G3
2023-02-27	Unidentified mammal	34.3579	124.753	G3
2023-02-27	Unidentified mammal	34.3861	124.826	G3
2023-02-27	White-cheeked Starling	34.4144	124.899	X3
2023-02-27	Dog	34.4426	124.971	X3
2023-02-27	White-cheeked Starling	34.4708	125.044	S2
2023-02-28	Blackbird	34.499	125.117	S1
2023-03-13	Blackbird	34.5273	125.189	G3
2023-03-13	Sparrow	34.5555	125.262	G3
2023-03-13	Unidentified bird	34.5837	125.335	S3
2023-03-13	Unidentified bird	34.612	125.408	S3
2023-03-14	Dog	34.6402	125.48	S2
2023-03-14	Unidentified mammal	34.6684	125.553	X2
2023-03-14	Unidentified mammal	34.6967	125.626	S1
2023-03-23	Dog	34.7249	125.698	X1
2023-03-23	Unidentified mammal	34.7531	125.771	X1
2023-03-24	Unidentified bird	34.7813	125.844	G3
2023-03-24	Unidentified bird	34.8096	125.917	G3
2023-03-24	Unidentified bird	34.8378	125.989	G3
2023-03-25	Sparrow	34.866	126.062	S2
2023-03-25	Dog	34.8943	126.135	S2
2023-03-25	Unidentified mammal	34.9225	126.207	S1
2023-04-13	Cat	34.9507	126.28	G1
2023-04-13	Unidentified bird	34.9789	126.353	G1
2023-04-14	Dog	35.0072	126.425	S2
2023-04-14	Dog	35.0354	126.498	S2
2023-04-27	Unidentified bird	35.0636	126.571	G3
2023-04-27	Light-vented Bulbul	35.0919	126.644	X3
2023-04-27	Unidentified mammal	35.1201	126.716	G1
2023-04-28	Red-breasted Flycatcher	35.1483	126.789	G2
2023-04-28	Unidentified bird	35.1765	126.862	S1
2023-04-28	Unidentified bird	35.2048	126.934	G1
2023-04-28	Sparrow	35.233	127.007	X1
2023-04-28	Unidentified bird	35.2612	127.08	X1
2023-04-28	Sparrow	35.2895	127.153	X1
2023-04-28	Bamboo Partridge	35.3177	127.225	S1
2023-04-28	Unidentified bird	35.3459	127.298	S1
2023-05-16	Unidentified mammal	35.3742	127.371	S1
2023-05-17	Unidentified bird	35.4024	127.443	S1
2023-05-17	Unidentified bird	35.4306	127.516	X1
2023-05-17	Blackbird	35.4588	127.589	X1
2023-05-18	Unidentified bird	35.4871	127.662	G1
2023-05-18	Dog	35.5153	127.734	G3
2023-05-18	Dog	35.5435	127.807	S3
2023-05-18	Unidentified bird	35.5718	127.88	S3
2023-05-18	Dog	35.6	127.952	X3
2023-05-18	Unidentified bird	35.6282	128.025	X3
2023-05-18	Unidentified mammal	35.6564	128.098	G1
2023-05-18	Unidentified mammal	35.6847	128.17	G1
2023-05-29	Blackbird	35.7129	128.243	X1
2023-05-29	Blackbird	35.7411	128.316	X1
2023-05-29	Crested Myna	35.7694	128.389	S1
2023-05-29	Hedgehog	35.7976	128.461	S1
2023-05-29	Blackbird	35.8258	128.534	S1
2023-05-29	Unidentified bird	35.854	128.607	S1
2023-05-29	Unidentified bird	35.8823	128.679	S1
2023-05-29	Weasel	35.9105	128.752	S1
2023-05-29	Unidentified bird	35.9387	128.825	S1
2023-05-29	Unidentified bird	35.967	128.898	S1
2023-05-30	Unidentified bird	35.9952	128.97	G1
2023-05-30	Unidentified bird	36.0234	129.043	G1
2023-05-30	Cat	36.0516	129.116	G1
2023-05-30	Unidentified bird	36.0799	129.188	G3
2023-05-30	Cat	36.1081	129.261	G3
2023-05-30	Unidentified bird	36.1363	129.334	G3
2023-05-30	Unidentified mammal	36.1646	129.406	G3
2023-05-30	Sparrow	36.1928	129.479	S3
2023-05-30	Unidentified bird	36.221	129.552	S3
2023-05-30	Cat	36.2493	129.625	S1
2023-06-13	Unidentified body	36.2775	129.697	S1
2023-06-13	Hedgehog	36.3057	129.77	S1
2023-06-13	Magpies	36.3339	129.843	S1
2023-06-13	Blackbird	36.3622	129.915	S1
2023-06-13	Sparrow	36.3904	129.988	S1
2023-06-13	Unidentified bird	36.4186	130.061	S1
2023-06-13	Cat	36.4469	130.134	X1
2023-06-13	Unidentified bird	36.4751	130.206	X1
2023-06-13	Sparrow	36.5033	130.279	X1
2023-06-13	Blackbird	36.5315	130.352	X1
2023-06-13	Blackbird	36.5598	130.424	S1
2023-06-16	Cat	36.588	130.497	G1
2023-06-16	Unidentified bird	36.6162	130.57	G1
2023-06-16	Unidentified bird	36.6445	130.642	G1
2023-06-16	Unidentified bird	36.6727	130.715	G3
2023-06-16	Unidentified mammal	36.7009	130.788	G3
2023-06-16	Unidentified bird	36.7291	130.861	G3
2023-06-16	Unidentified bird	36.7574	130.933	G3
2023-06-16	Unidentified bird	36.7856	131.006	G3
2023-06-16	Cat	36.8138	131.079	G3
2023-06-16	Sparrow	36.8421	131.151	G3
2023-06-16	Light-vented Bulbul	36.8703	131.224	S3
2023-06-16	Light-vented Bulbul	36.8985	131.297	S3
2023-06-17	Unidentified bird	36.9268	131.37	X2
2023-06-17	Blackbird	36.955	131.442	X2
2023-06-17	Unidentified bird	36.9832	131.515	S2
2023-06-22	Unidentified bird	37.0114	131.588	S1
2023-06-22	Unidentified bird	37.0397	131.66	S1
2023-06-22	Unidentified bird	37.0679	131.733	S3
2023-06-22	Unidentified bird	37.0961	131.806	G3
2023-06-22	Unidentified bird	37.1244	131.879	G3
2023-06-22	Dog	37.1526	131.951	G3
2023-06-22	Unidentified mammal	37.1808	132.024	G3
2023-06-22	Unidentified mammal	37.209	132.097	G1
2023-06-23	Sparrow	37.2373	132.169	S2
2023-06-23	Crested Myna	37.2655	132.242	G2
2023-06-23	Hare	37.2937	132.315	G2
2023-06-23	Red-billed Blue Magpie	37.322	132.387	X2
2023-06-23	Blackbird	37.3502	132.46	S1
2023-06-23	Blackbird	37.3784	132.533	X1
2023-07-10	Unidentified bird	37.4066	132.606	G3
2023-07-10	Sparrow	37.4349	132.678	G3
2023-07-10	Unidentified bird	37.4631	132.751	G3
2023-07-10	Dog	37.4913	132.824	S3
2023-07-10	Unidentified body	37.5196	132.896	S3
2023-07-10	Unidentified bird	37.5478	132.969	X3
2023-07-10	Unidentified bird	37.576	133.042	G1
2023-07-10	Dog	37.6043	133.115	G1
2023-07-10	Unidentified mammal	37.6325	133.187	G1
2023-07-10	Dog	37.6607	133.26	G1
2023-07-10	Cat	37.6889	133.333	G1
2023-07-14	Cat	37.7172	133.405	S2
2023-07-14	Unidentified mammal	37.7454	133.478	S2
2023-07-14	Tabby-necked snake	37.7736	133.551	X1
2023-07-14	Dog	37.8019	133.623	X1
2023-07-22	Tabby-necked snake	37.8301	133.696	G3
2023-07-22	Unidentified bird	37.8583	133.769	G3
2023-07-22	Cat	37.8865	133.842	G3
2023-07-22	Unidentified bird	37.9148	133.914	G3
2023-07-22	Dog	37.943	133.987	X3
2023-07-22	Azure-winged Magpie	37.9712	134.06	X3
2023-07-22	Unidentified bird	37.9995	134.132	G1
2023-07-22	Unidentified bird	38.0277	134.205	G1
2023-07-23	Unidentified bird	38.0559	134.278	S1
2023-07-23	Cat	38.0841	134.351	S1
2023-07-23	Unidentified bird	38.1124	134.423	X2
2023-07-23	Unidentified mammal	38.1406	134.496	S2
2023-07-23	Unidentified bird	38.1688	134.569	S2
2023-07-23	Dog	38.1971	134.641	S2
2023-07-23	Dog	38.2253	134.714	S2
2023-07-23	Unidentified body	38.2535	134.787	S1
2023-07-23	Unidentified bird	38.2817	134.859	S1
2023-07-23	Unidentified bird	38.31	134.932	S1
2023-07-23	Sparrow	38.3382	135.005	X1
2023-07-23	Unidentified bird	38.3664	135.078	X1
2023-08-09	Unidentified bird	38.3947	135.15	S1
2023-08-09	Unidentified mammal	38.4229	135.223	S1
2023-08-09	Unidentified mammal	38.4511	135.296	S2
2023-08-09	Blackbird	38.4794	135.368	S2
2023-08-09	Weasel	38.5076	135.441	G2
2023-08-09	Azure-winged Magpie	38.5358	135.514	X2
2023-08-10	Unidentified bird	38.564	135.587	S1
2023-08-10	Blackbird	38.5923	135.659	S1
2023-08-11	Cat	38.6205	135.732	G1
2023-08-11	Unidentified bird	38.6487	135.805	G3
2023-08-11	Cat	38.677	135.877	G1
2023-08-28	Dog	38.7052	135.95	G1
2023-08-28	Unidentified mammal	38.7334	136.023	G1
2023-08-28	Dog	38.7616	136.096	G3
2023-08-28	Cat	38.7899	136.168	G3
2023-08-28	Dog	38.8181	136.241	G3
2023-08-28	Spotted Dove	38.8463	136.314	G3
2023-08-28	Spotted Dove	38.8746	136.386	G3
2023-08-28	Unidentified body	38.9028	136.459	G1
2023-08-29	Tabby-necked snake	38.931	136.532	S2
2023-08-29	Weasel	38.9592	136.604	G2
2023-08-29	Cat	38.9875	136.677	S1
2023-08-29	Cat	39.0157	136.75	S1
2023-08-29	Weasel	39.0439	136.823	X1
2023-09-12	Tabby-necked snake	39.0722	136.895	S1
2023-09-12	Unidentified bird	39.1004	136.968	S1
2023-09-13	Dog	39.1286	137.041	S1
2023-09-13	Unidentified bird	39.1569	137.113	X2
2023-09-13	Dog	39.1851	137.186	S2
2023-09-14	Cat	39.2133	137.259	G1
2023-09-14	Unidentified bird	39.2415	137.332	G1
2023-09-14	Dog	39.2698	137.404	G1
2023-09-14	Dog	39.298	137.477	G3
2023-09-14	Mouse	39.3262	137.55	S3
2023-09-14	Cat	39.3545	137.622	S3
2023-09-14	Mouse	39.3827	137.695	S3
2023-09-14	Dog	39.4109	137.768	X3
2023-09-14	Dog	39.4391	137.84	G3
2023-09-14	Unidentified body	39.4674	137.913	G1
2023-09-14	Dog	39.4956	137.986	G1
2023-09-25	Mouse	39.5238	138.059	G3
2023-09-25	Weasel	39.5521	138.131	S3
2023-09-25	Mouse	39.5803	138.204	G3
2023-09-25	Weasel	39.6085	138.277	G3
2023-09-25	Dog	39.6367	138.349	G3
2023-09-25	Weasel	39.665	138.422	X1
2023-09-25	Weasel	39.6932	138.495	X1
2023-09-25	Tabby-necked snake	39.7214	138.568	X1
2023-09-26	Cat	39.7497	138.64	S1
2023-09-26	Unidentified bird	39.7779	138.713	S1
2023-09-26	Weasel	39.8061	138.786	S2
2023-09-26	Dog	39.8344	138.858	X2
2023-10-13	Azure-winged Magpie	39.8626	138.931	X2
2023-10-13	Unidentified bird	39.8908	139.004	S1
2023-10-13	Unidentified body	39.919	139.076	S1
2023-10-13	Unidentified mammal	39.9473	139.149	S1
2023-10-13	Oriental Turtle Dove	39.9755	139.222	S1
2023-10-13	Cat	40.0037	139.295	X1
2023-10-14	Weasel	40.032	139.367	G3
2023-10-14	Weasel	40.0602	139.44	G3
2023-10-14	Mouse	40.0884	139.513	G1
2023-10-26	Weasel	40.1166	139.585	X1
2023-10-26	Weasel	40.1449	139.658	X1
2023-10-26	Unidentified bird	40.1731	139.731	X1
2023-10-26	Unidentified body	40.2013	139.804	S1
2023-10-26	Unidentified bird	40.2296	139.876	S2
2023-10-26	Unidentified body	40.2578	139.949	S1
2023-10-26	Unidentified body	40.286	140.022	S1
